# Supplementary material for: The Kinetic Energy Budget of the Atmosphere (KEBA) model 1.0: a simple yet physical approach for estimating regional wind energy resource potentials that includes the kinetic energy removal effect by wind turbines
Source: Copernicus journal article supplement (doi:10.5194/gmd-13-4993-2020), 2020-10-22
Supplement: Supplementary file 1 [file gmd-13-4993-2020-supplement.zip]

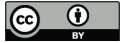

## *Supplement of*

# **The Kinetic Energy Budget of the Atmosphere (KEBA) model 1.0: a simple yet physical approach for estimating regional wind energy resource potentials that includes the kinetic energy removal effect by wind turbines**

**Axel Kleidon and Lee M. Miller**

*Correspondence to:* Axel Kleidon ([akleidon@bgc-jena.mpg.de](mailto:akleidon@bgc-jena.mpg.de))

- [gmd-13-4993-2020-supplement-title-page.pdf](#)
- [KEBA 1.0 Users Guide.pdf](#)
- [KEBA 1.0.xlsx](#)

The copyright of individual parts of the supplement might differ from the CC BY 4.0 License.
